# Supplementary material for: Metal-free approach towards efficient synthesis of FDCA using a p-toluene sulfonic acid (p-TSA)-derived heterogeneous solid acid catalyst and oxone over two steps from HMF, fructose and glucose
Source: Royal Society of Chemistry journal article supplement (doi:10.1039/d2nj01207c), 2022-01-01
Supplement: d2nj01207c1.pdf [file d2nj01207c1.pdf]

## **Supporting Information**

### **Metal-Free approach towards efficient synthesis of FDCA using *p*-toluene sulfonic acid (*p*-TSA) derived heterogeneous solid acid catalyst and Oxone over Two Steps from HMF, Fructose and Glucose**

**Asma T. Biradar Tamboli<sup>†‡</sup> Swapnali P. Kirdant<sup>†‡</sup> & Vrushali H. Jadhav<sup>\*†‡</sup>**

---

<sup>†</sup>Division of Catalysis & Inorganic Chemistry, CSIR-National Chemical Laboratory, Dr. Homi-Bhabha Road, Pashan, Pune 411008, India

<sup>‡</sup>Academy of Scientific and Innovative Research (AcSIR), Ghaziabad 201002, India

---

#### **Instrumentation**

<sup>1</sup>H and <sup>13</sup>C NMR were recorded on Bruker 400 MHz and Bruker 500 MHz instrument. GC was measured on Thermo Scientific Trace 1110 instrument using TG-624 column (6% cyanopropylphenylmethypolysilozane) and FID detector. GC-Mass was measured on Agilent 7890 BGC instrument using HP-5 MS column and EI source. Fourier transform infrared FTIR (Spectrum 400), The FTIR spectrum for the catalyst was obtained using the KBr pellet method. Powder X-ray diffraction P-XRD (Rigaku MiniFlex 600) was recorded using CuK $\alpha_1$  (T=1.5 A°) as a radiation source with tube current and voltage of 40 mA and 40 kV. Thermogravimetric analysis TGA was done on Perkin Elmer Pyris 1 TGA instrument. The sample was heated till 500 °C at a rate of 10 °C/min. X-ray photo electron spectroscopy (XPS) was measured on Thermo K-alpha ESCA.

#### **Spectral data for 2, 5-Diformylfuran:**

<sup>1</sup>H NMR (400 MHz, CDCl<sub>3</sub>)  $\delta$  7.27 (s, 2H), 9.80 (s, 2H); <sup>13</sup>C NMR (100 MHz, CDCl<sub>3</sub>)  $\delta$  119.1, 154.2, 179.2; GC-MS: m/z 124, 95, 67, 50, 39, 28

#### **Spectral data for FDCA**

<sup>1</sup>H NMR (500 MHz, D<sub>2</sub>O):  $\delta$  7.12 (s, 2H); <sup>13</sup>C NMR (125 MHz, D<sub>2</sub>O):  $\delta$  118.3, 147.9 and 162.8. LC-Mass: 157 [M +1].

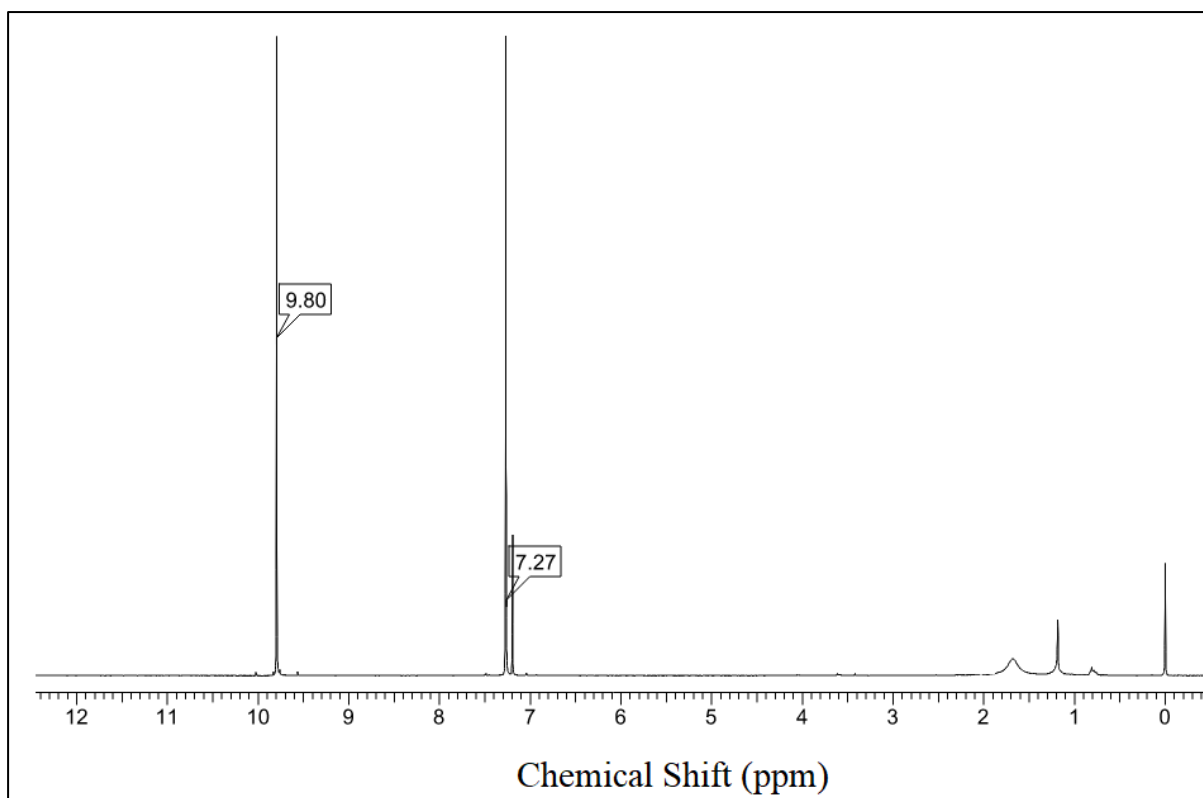

**Figure S1:**  $^1\text{H}$  NMR (400 MHz,  $\text{CDCl}_3$ ) of crude 2, 5-Diformylfuran

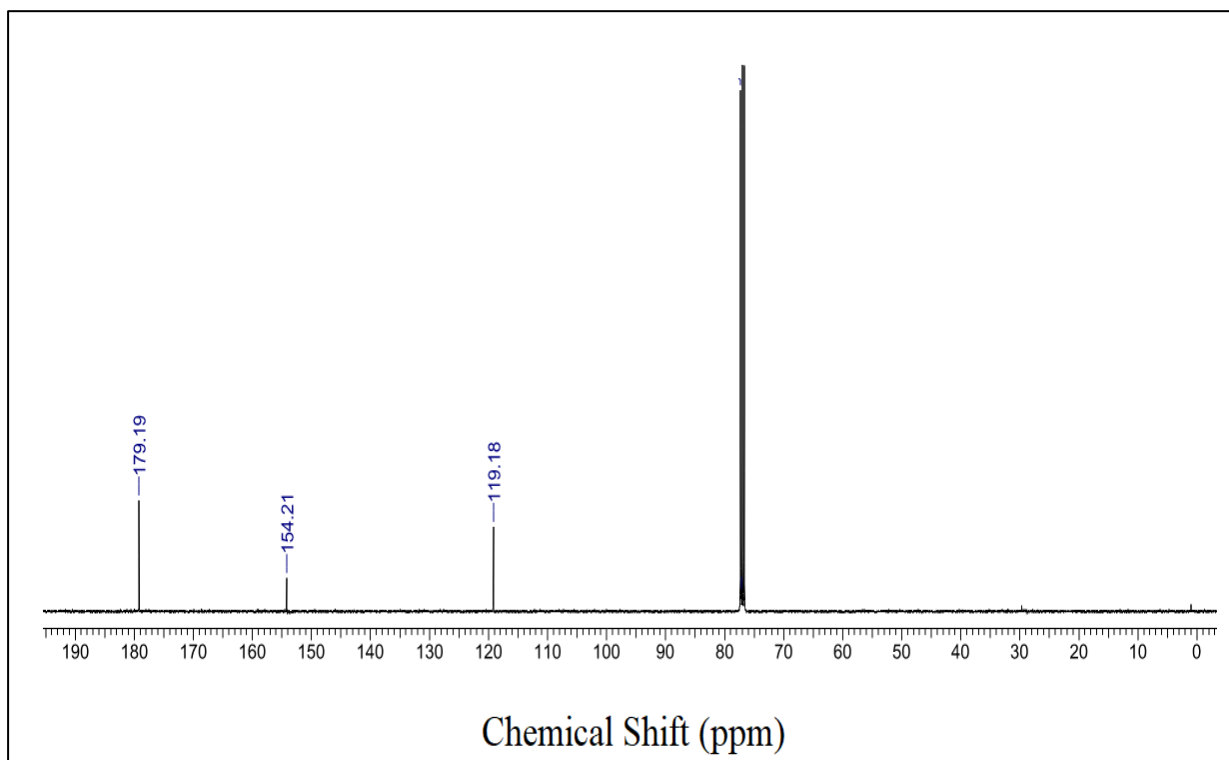

**Figure S2:**  $^{13}\text{C}$  NMR (100 MHz,  $\text{CDCl}_3$ ) of crude 2, 5-Diformylfuran

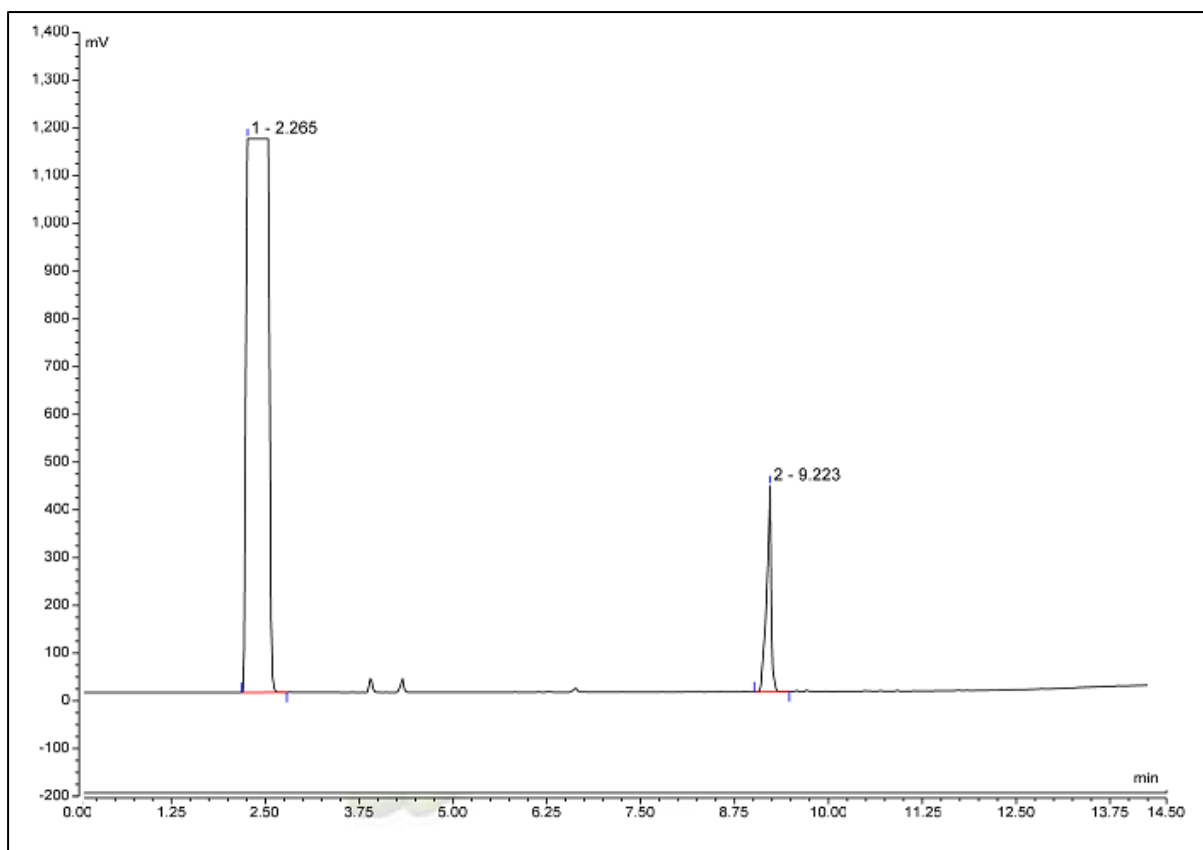

**Figure S3:** GC of crude 2, 5-Diformylfuran

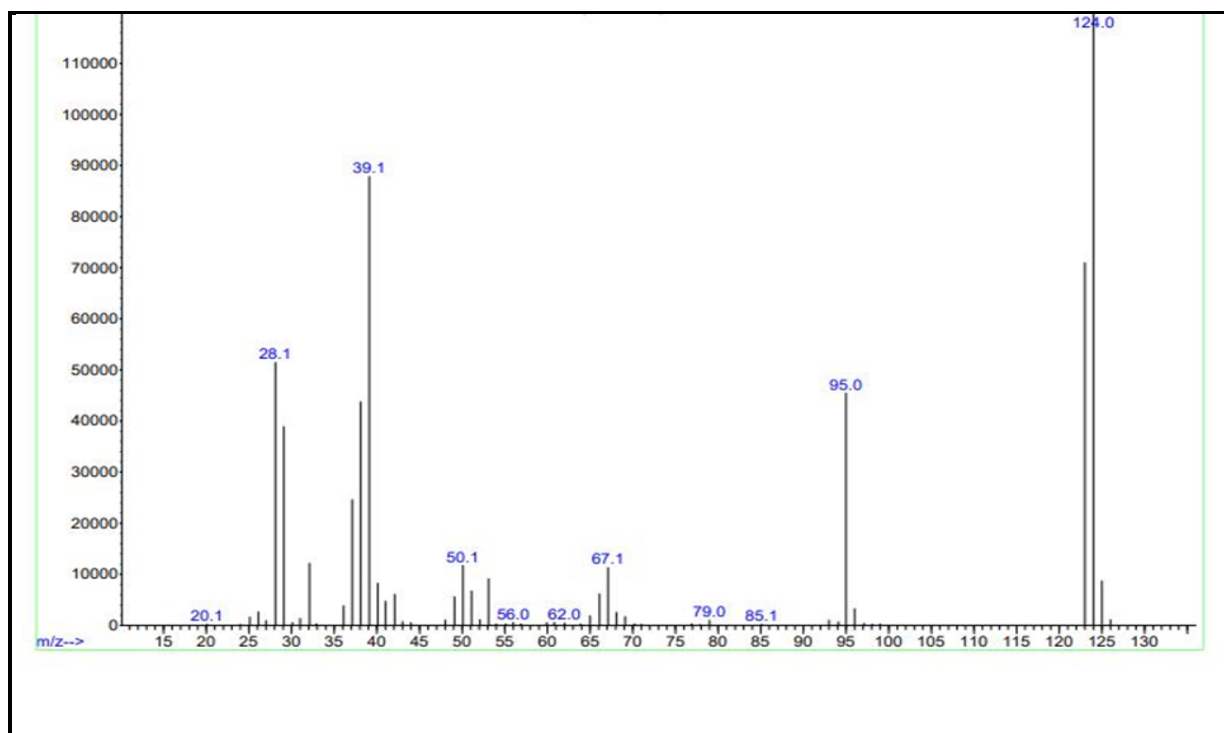

**Figure S4:** GC-MS of 2, 5-Diformylfuran

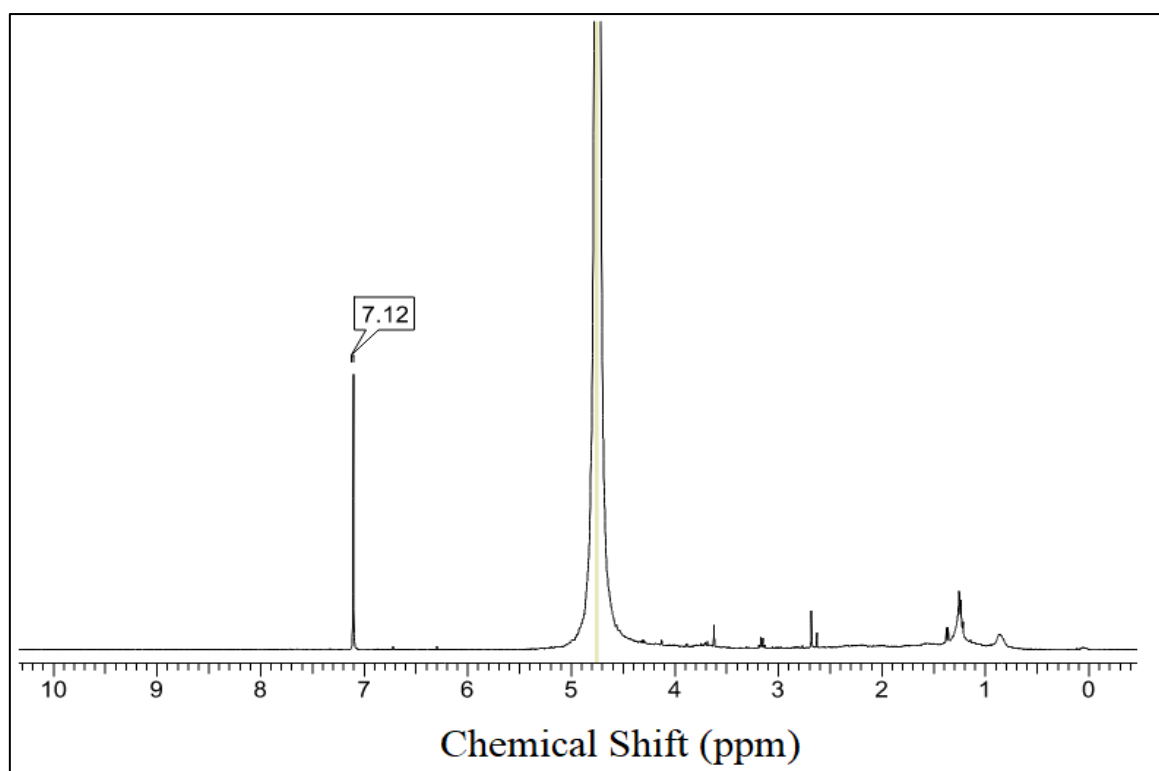

**Figure S5:** <sup>1</sup>H NMR (500 MHz, D<sub>2</sub>O) of crude FDCA

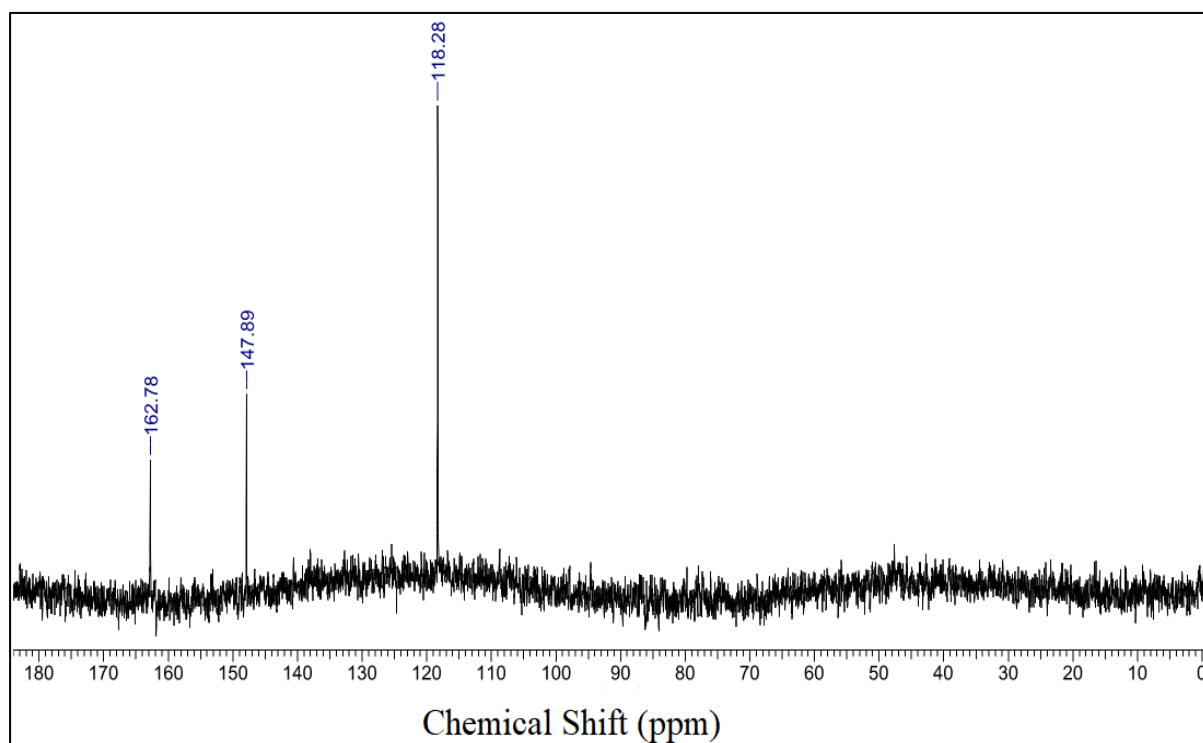

**Figure S6:** <sup>13</sup>C NMR (125 MHz, D<sub>2</sub>O) of crude FDCA

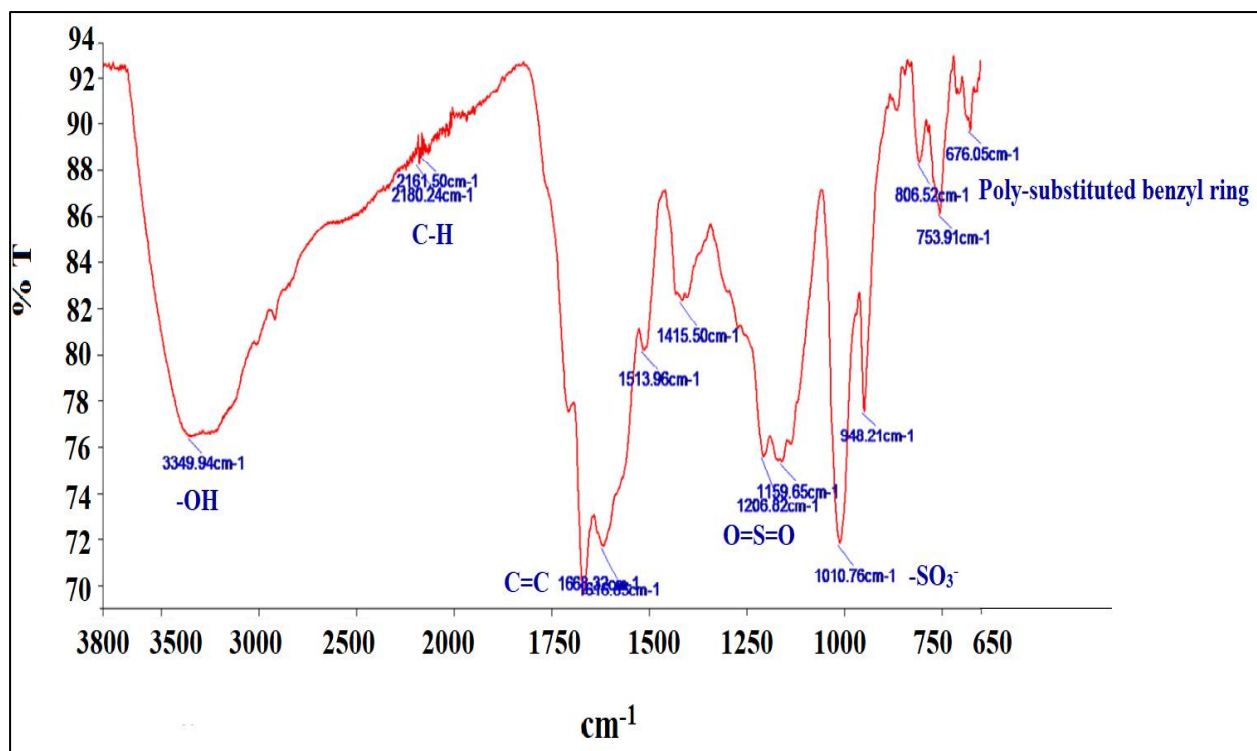

Figure S7: FT-IR of reused *p*-TSA-POM catalyst

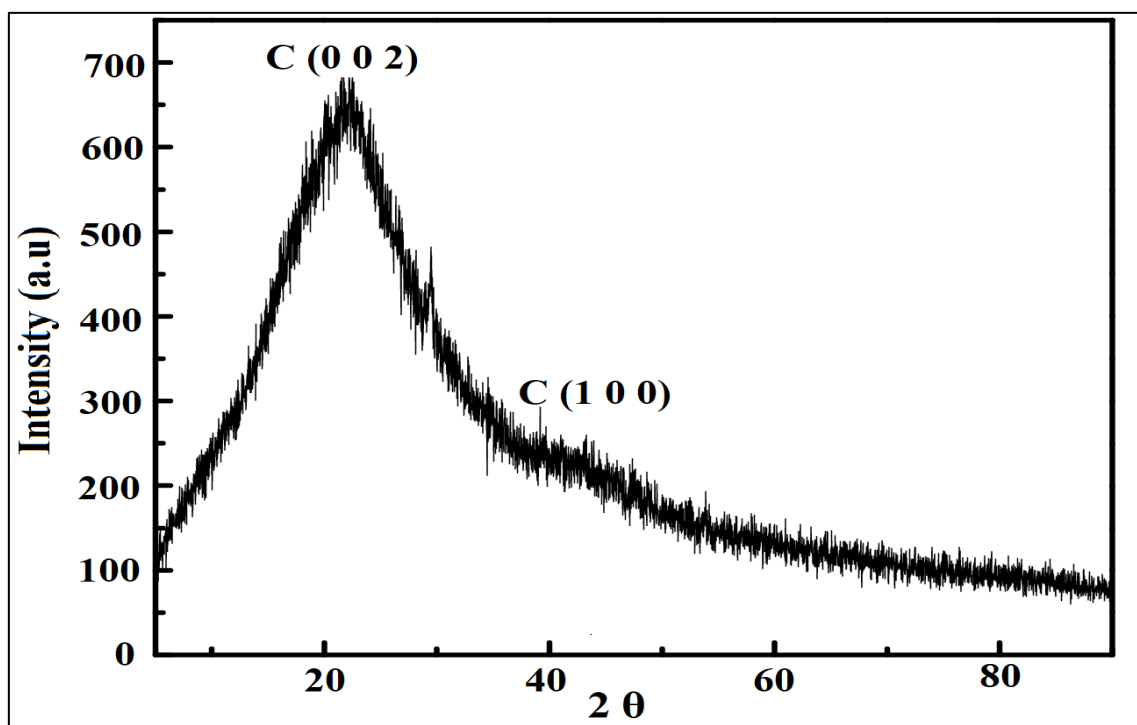

Figure S8: P-XRD of reused *p*-TSA-POM catalyst

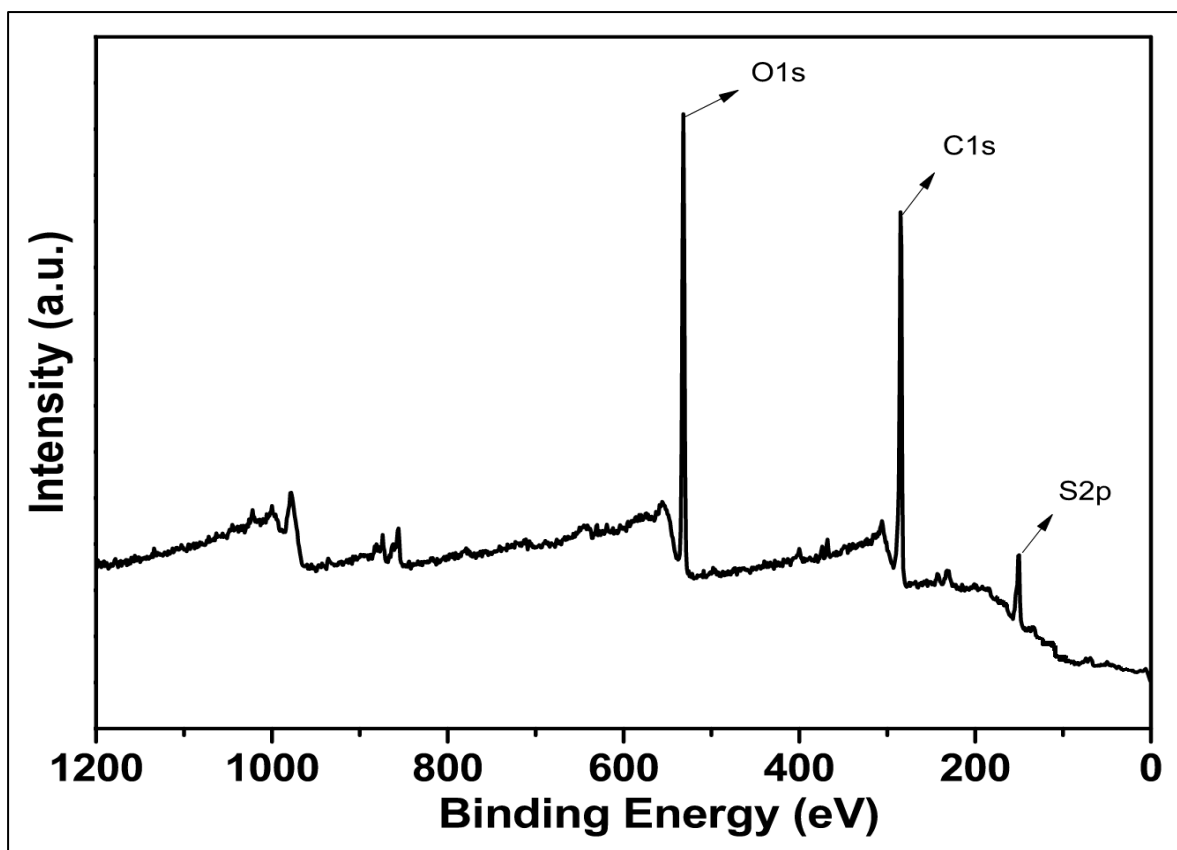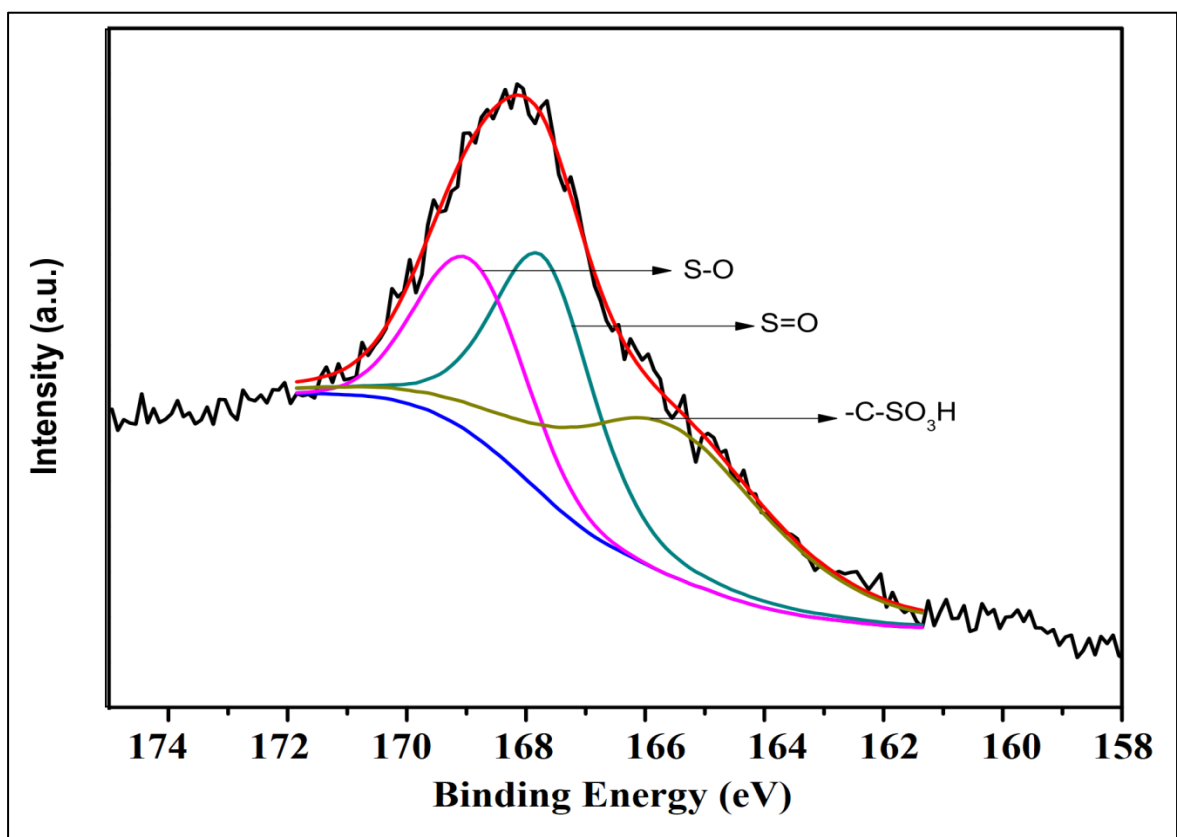

**Figure S9:** Survey & S 2p XPS spectrum of reused *p*-TSA-POM catalyst

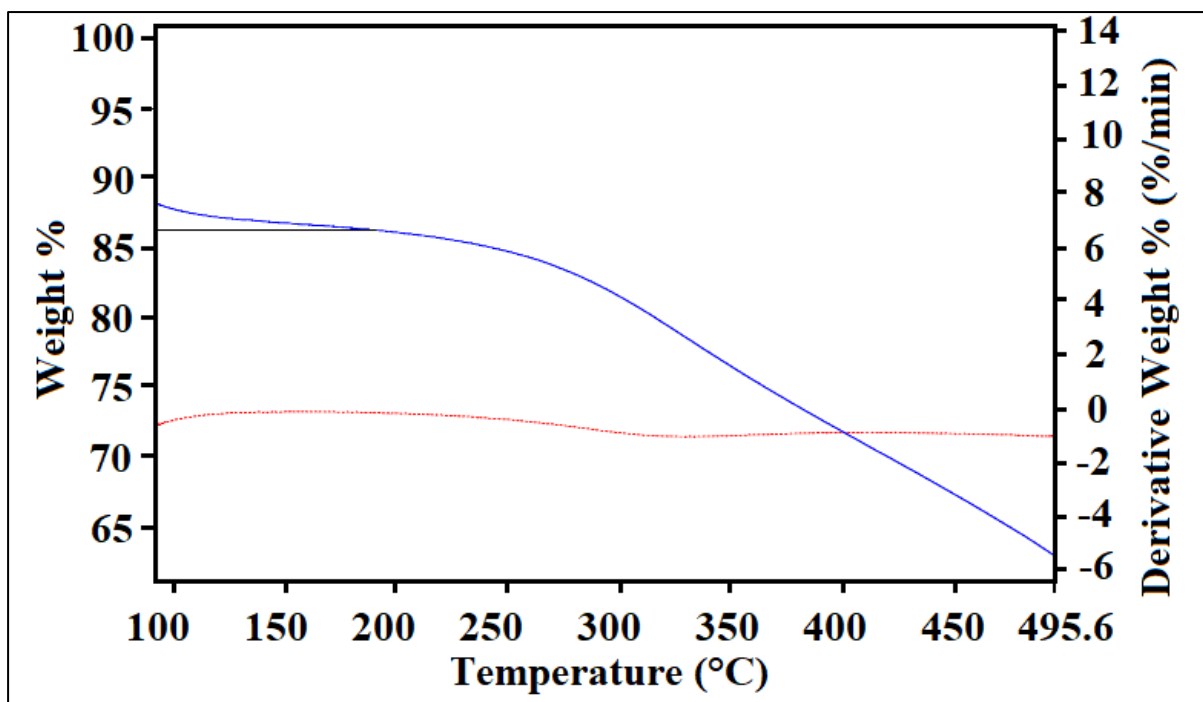

**Figure S10:** TGA of reused *p*-TSA-POM catalyst

#### **Titration procedure for measuring acidity of the *p*-TSA-POM catalyst:**

**The measurement of the -SO<sub>3</sub>H functional group:** A sodium hydroxide solution (0.05 mol L<sup>-1</sup>, 30 mL) was added to catalyst (0.25 g). The mixture was stirred for 60 min at room temperature under ultrasonic vibration. After centrifugal separation, the supernatant solution was titrated with hydrochloric acid (0.05 mol L<sup>-1</sup>) using phenolphthalein as an indicator.
